# Supplementary material for: Professional Athletes Maintain High TNF-Alpha or IFN-Gamma Related Inflammatory Status after Recovering from COVID-19 Infection without Developing a Neutralizing Antibody Response
Source: MDPI journal article supplement (doi:10.3390/sports11050097), 2023-04-30
Supplement: s1 [file s1]

## Sheet: Munka1
Sport	MIP-1beta	IL-6	IFN-gamma	IL-1ra	IL-5	GM-CSF	TNF-alfa	RANTES	IL-2	IL-1beta	Eotaxin	BFGF	VEGF	PDGF-BB	IP-10	IL-13	IL-4	MCP-1	IL-8	MIP-1alfa	IL-10	G-CSF	IL-15	IL-7	IL-12	IL-17	IL-9
Wrestling	10.97	1.6	10.23	30.36	4.15	0.84	16.3	3214	1	1.13	29.06	4.37	4.64	25.64	180.98	1.71	0.53	12.91	2.56	0.51	2.6	6.93	10	8.04	0.89	1.67	12.79
Wrestling	9.64	1.6	12.58	352.04	4.15	3.36	20.42	533.62	1	14.16	31.8	10.57	85.78	46.84	118.2	13.83	0.97	9.77	28.64	0.68	8	24.32	27.7	18.34	9.88	1.69	22.23
Wrestling	1.37	1.6	45.47	14.94	4.15	0.84	1.83	2.48	1	0.69	0.87	4.37	167.77	23.14	7.8	0.12	0.53	0.29	0.52	0.51	2.6	15.83	62.42	3.64	0.89	1.67	6.31
Wrestling	1.37	1.6	40.94	16.94	4.15	0.84	1.83	1.65	1	0.69	0.59	4.37	161.6	20.69	7.8	0.05	0.53	0.29	0.52	0.51	2.6	15.83	55.68	3.64	0.89	1.67	7.2
Wrestling	1.37	1.6	33.89	5.04	4.15	0.84	1.83	1.65	1	0.45	0.09	4.37	137.61	15.9	7.8	0.05	0.53	0.29	0.52	0.51	2.6	9.82	49.83	2.77	0.89	1.67	4.68
Wrestling	2.31	1.6	10.23	5.04	4.15	0.84	7.39	139.21	1	0.86	19.73	4.37	4.64	20.69	59.8	0.77	0.53	7.23	0.52	0.51	2.6	6.93	10	5.8	0.89	1.67	5.07
Wrestling	24.6	1.6	14.33	45.27	4.15	2.76	50.24	18481	1.54	3.7	62.57	9.52	35.26	12591	315.98	3.18	1.14	11.61	2.56	0.68	2.6	18.33	32.16	15.08	2.66	5.47	32.73
Wrestling	8.62	1.6	10.23	14.94	4.15	0.84	8.9	4242	1	0.86	15.57	4.37	4.64	38.67	18.51	0.38	0.53	4.89	0.52	0.51	2.6	6.93	10	5.8	0.89	1.67	8.12
Wrestling	12.99	1.6	10.23	79.88	4.15	0.84	19.28	18481	1	2.72	26.95	5.97	5.8	78.62	141.48	1.82	0.53	8.26	0.52	0.51	2.6	6.93	16.5	7.66	0.89	1.67	15.71
Wrestling	13.22	1.6	10.23	14.94	4.15	0.84	13.77	18481	1	0.95	16.16	4.37	4.64	78.62	109.04	0.12	0.53	5.17	0.52	0.51	2.6	6.93	10	6.54	0.89	1.67	15.71
Wrestling	1.37	1.6	43.43	7.93	5.04	0.84	1.83	6.61	1	0.61	0.59	4.37	152.17	20.69	7.8	0.05	0.53	0.29	0.52	0.51	2.6	16.48	55.68	2.94	0.89	1.67	6.31
Wrestling	1.37	1.6	38.52	10.5	4.15	0.84	1.83	1.65	1	0.53	0.09	4.37	141.71	20.69	7.8	0.05	0.53	0.29	0.52	0.51	2.6	13.78	43.42	2.94	0.89	1.67	4.68
Wrestling	1.37	1.6	44.44	14.94	4.47	0.84	1.83	1.65	1	0.69	0.66	4.37	178.4	23.14	7.8	0.05	0.53	0.29	0.52	0.51	2.6	15.17	63.7	2.94	0.89	1.67	6.75
Wrestling	1.69	1.6	39	16.94	7.14	0.84	1.83	4.33	1	1.73	1.37	4.37	108.39	33.36	7.8	0.2	0.53	0.29	0.52	0.51	2.6	17.42	22.63	2.77	0.89	1.67	5.48
Wrestling	1.37	1.6	46.51	5.04	4.15	0.84	1.83	1.27	1	0.61	0.26	4.37	164.69	23.14	7.8	0.05	0.53	0.29	0.52	0.51	2.6	11.51	63.7	2.94	0.89	1.67	6.31
Wrestling	1.37	1.6	39.48	10.5	7.14	0.84	2.33	2.48	1	0.77	0.09	4.37	135.96	23.14	7.8	0.05	0.53	0.29	0.52	0.51	2.6	22.78	66.21	4.35	0.89	1.67	7.2
Swimming	9.84	1.6	10.23	5.04	4.15	0.84	5.8	3606	1	0.77	18.68	4.55	4.64	30.75	80.41	0.38	0.53	6.57	1.52	0.51	2.6	6.93	10	5.07	0.89	1.67	13.35
Swimming	8.42	1.6	10.23	18.84	4.15	0.84	10.36	1407	1	1.73	31.16	4.37	15.42	23.14	113.92	2.95	0.53	14.84	0.52	0.51	2.6	6.93	10	8.8	0.89	1.67	10.35
Swimming	7.15	1.6	10.23	14.94	4.15	0.84	10.36	951.48	1	3.08	32.8	4.37	4.64	23.14	51.36	1.71	0.53	8.65	0.52	0.51	2.6	6.93	10	8.04	0.89	1.67	9.09
Swimming	1.37	1.6	32.99	5.04	4.15	0.84	1.83	5.32	1	0.61	0.43	4.37	160.82	18.27	7.8	0.05	0.53	0.29	0.52	0.51	2.6	13.05	52.82	2.77	0.89	1.67	5.07
Swimming	7.26	1.6	10.23	14.94	4.15	0.91	10.36	3877	1	1.99	10.76	4.37	15.42	44.09	147.63	2.83	0.53	6.3	0.52	0.51	2.6	6.93	10	7.66	0.89	1.67	13.35
Swimming	1.37	1.6	42.42	18.84	6.13	0.84	1.83	5.32	1	0.69	0.87	4.37	173.87	23.14	7.8	0.05	0.53	0.29	0.52	0.51	2.6	15.17	63.7	2.94	0.89	1.67	6.31
Swimming	1.37	1.6	27.87	5.04	4.15	0.84	1.83	1.65	1	0.45	0.09	4.37	120.74	13.59	7.8	0.05	0.53	0.29	0.52	0.51	2.6	6.93	27.7	2.77	0.89	1.67	3.76
Swimming	8.88	1.6	10.23	14.94	4.15	0.84	11.76	1163	1	1.18	13.55	4.37	4.64	28.18	88.32	1.02	0.53	6.1	0.52	0.51	2.6	6.93	10	6.17	0.89	1.67	12.79
Biking	12.27	1.6	10.23	14.94	4.15	0.84	13.11	4620	1	1.37	37.61	4.37	4.64	28.18	62.22	1.82	0.53	10.82	0.52	0.51	2.6	6.93	10	8.04	0.89	1.67	16.32
Kayaking	1.37	1.6	22.4	5.04	4.15	0.84	1.83	0.51	1	0.45	0.09	4.37	134.3	13.59	7.8	0.05	0.53	0.29	0.52	0.51	2.6	6.93	10	2.77	0.89	1.67	3.25
Kayaking	10.82	1.6	10.23	18.84	4.15	0.84	11.76	4932	1	1.23	12.41	4.37	4.64	38.67	92.58	0.38	0.53	4.2	0.52	0.51	2.6	6.93	10	5.8	0.89	1.67	13.64
Fencing	1.37	1.6	37.57	10.5	5.04	0.84	1.83	2.05	1	0.61	0.09	4.37	145.76	20.69	7.8	0.05	0.53	0.29	0.52	0.51	2.6	8.9	52.82	2.77	0.89	1.67	5.89
Swimming	1.37	1.6	39.48	5.04	5.6	0.84	1.83	4.82	1	0.61	0.43	4.37	161.6	23.14	7.8	0.05	0.53	0.29	0.52	0.51	2.6	13.05	58.45	2.94	0.89	1.67	6.31
Average	5.78828	1.6	24.9683	27.4903	4.5469	0.995517	8.19862	2902.47	1.01862	1.58345	12.6007	4.82276	84.3045	462.501	58.5321	1.16793	0.566207	4.19552	1.66483	0.521724	2.78621	11.3262	32.2455	5.61138	1.26103	1.80172	9.88828
SD	5.72315	6.77925e-16	14.8285	64.1954	0.866467	0.577566	10.016	5628.07	0.100275	2.55367	15.8722	1.48336	71.9329	2332.7	72.7203	2.62662	0.13728	4.66244	5.2169	0.0438397	1.00275	5.25636	22.6921	3.7327	1.68989	0.705519	6.40347
Supplementary table 1. raw output data for the cytokine assay
